# Supplementary material for: Exploring The Prevalence and Association Between Malnutrition And Frailty Among Older Adults at Old-Age Homes in Karachi Pakistan: A Cross-Sectional Analytical Study
Source: Research Square preprint supplement (doi:10.21203/rs.3.rs-6894180/v1), 2025-09-11
Supplement: Supplementary file 1 [file b7ebc44c8ab6a553a4180872.docx]

**Manuscript Title**

Exploring The Prevalence and Association Between Malnutrition and Frailty Among Older Adults at Old-Age Homes in Karachi Pakistan: A Cross-Sectional Analytical Study

**Author Affiliations**

**Muhammad Mudasar *(Corresponding Author)***
• Email: rahimoonmudasir311@gmail.com
• Institution: School of Nursing and Midwifery, Aga Khan University
• City: Karachi
• Country: Pakistan

**Dr. Rubina Barolia**
• Email: rubina.barolia@aku.edu
• Institution: School of Nursing and Midwifery, Aga Khan University
• City: Karachi
• Country: Pakistan

**Dr. Laila Cassum**
• Email: laila.cassum@aku.edu
• Institution: School of Nursing and Midwifery, Aga Khan University
• City: Karachi
• Country: Pakistan

**Miss Yasmin Parpio**
• Email: yasmin.parpio@aku.edu
• Institution: School of Nursing and Midwifery, Aga Khan University
• City: Karachi
• Country: Pakistan

**Rashid Minhas *(Corresponding Author)***

• Email: [Rashidminhasghazni@gmail.com](mailto:Rashidminhasghazni@gmail.com)
• Institution: Student BS Psychology (AP), The Superior university
• City: Sargodha
• Country: Pakistan

**Author Contributions Declaration**

- **Study conception and design:** MM, YP
- **Data collection:** MM,
- **Data analysis:** MM,
- **Study supervision:** RB, LC
- **Manuscript writing:** MM, YP, RM
- **Critical revisions for important intellectual content:** RB, LC
- **Statistical expertise:** MM, YP
- **Administrative, technical, or material support:** YP, LC, RB, RM

**Corresponding Author**

- 1. **Muhammad Mudasar**

• Email: rahimoonmudasir311@gmail.com
• Institution: School of Nursing and Midwifery, Aga Khan University
• City: Karachi
• Country: Pakistan

**2. Rashid Minhas**

• Email: [Rashidminhasghazni@gmail.com](mailto:Rashidminhasghazni@gmail.com)
• Institution: Student BS Psychology (AP), The Superior university
• City: Sargodha
• Country: Pakistan

**Conflict of Interest**

Muhammad Mudasar, Dr. Rubina Barolia, Dr. Laila Cassum, Miss Yasmin Parpio and Rashid Minhas declare that they have no conflicts of interest related to the content of this manuscript.

**Funding Declaration**

This research received no specific grant from any funding agency in the public, commercial, or not-for-profit sectors.

**Human Ethics and Consent to Participate**

**Ethical Approval:**
This study was reviewed and approved by the Ethical Review Committee (ERC) of Aga Khan University (Approval No. 2024-10165-29438). Ethical approval was obtained prior to data collection to ensure participant rights, dignity, and welfare were safeguarded.

**Informed Consent:**
All participants provided written informed consent before participating in the study. They were informed about the study's objectives, procedures, potential risks, and benefits. Consent forms were available in both English and Urdu to accommodate participants’ language preferences. In cases where participants were unable to provide consent themselves, consent was obtained from legally authorized representatives.

**Acknowledgment**

We would like to thank to the library staff and institutional support teams who facilitated access to essential databases and resources critical to the literature search process.

**Clinical-trial registration**

Clinical trial numbers are not applicable for this study.
